# Supplementary material for: Neonatal Inflammation Predicts Adolescent Brain Volume and Neurologic Outcomes in Extremely Preterm Births
Source: Research Square preprint supplement (doi:10.21203/rs.3.rs-8206325/v1), 2025-12-15
Supplement: Supplementary file 1 [file 2c31689ac3db8d9c11247414.pdf]

## Supplemental Tables

**Supplemental Table 1.** Inflammation-related proteins associated with structural and functional neurologic outcomes in the ELGAN cohort.

| Protein       | Protein Name                       | Associated Outcome                                                                                                                                                                             | Neurodevelopment Association in ELGAN                                                  |
|---------------|------------------------------------|------------------------------------------------------------------------------------------------------------------------------------------------------------------------------------------------|----------------------------------------------------------------------------------------|
| IL-6          | Interleukin (IL) -6                | Ventriculomegaly (when in the NICU) and microcephaly at age 2 years; latent profile analysis of cognition; indicator of brain damage                                                           | Leviton et al. 2016; O'Shea et al. 2013; Korzeniewski et al. 2018; Leviton et al. 2018 |
| TNF- $\alpha$ | Tumor necrosis factor-alpha        | Mental Development Index of the Bayley-II < 55 at age 2 years                                                                                                                                  | Leviton et al. 2016; O'Shea et al. 2013; Korzeniewski et al. 2018                      |
| ICAM -1       | Intercellular adhesion molecule -1 | Ventriculomegaly (when in the NICU) and microcephaly at age 2 years; indicator of brain damage; Mental Development Index of the Bayley-II < 55 and Psychomotor Development Index < 55 at age 2 | Leviton et al. 2016; O'Shea et al. 2013; Korzeniewski et al. 2018; Leviton et al. 2018 |
| IL -8         | Interleukin (IL) -8                | Ventriculomegaly (when in the NICU) and microcephaly at age 2 years; indicator of brain damage                                                                                                 | Leviton et al. 2016; Korzeniewski et al. 2018; Leviton et al. 2018                     |
| SAA           | Serum amyloid A                    | Mental Development Index of the Bayley-II < 55 at age 2 years                                                                                                                                  | O'Shea et al. 2013; Korzeniewski et al. 2018                                           |
| CRP           | C-reactive protein                 | Ventriculomegaly (when in the NICU) and microcephaly at age 2 years; Mental Development Index of the Bayley-II < 55 at age 2 years                                                             | O'Shea et al. 2013; Korzeniewski et al. 2018                                           |

**Supplemental Table 2.** Adjusted Brain Volumes (cm<sup>3</sup>) in ELGAN Adolescents (N=323), overall and stratified by sex. Mean brain volume proportions adjusted for each participant's brain region relative to total brain volume. Statistically significant p-values, ( $p \leq 0.05$ ), are shown in bold.

| Brain Region            | Overall (N=323) | Female (N=156) | Male (N=167) | P-value          |
|-------------------------|-----------------|----------------|--------------|------------------|
| Cerebral cortex         | 46.2 (1.84)     | 46.4 (1.82)    | 46.0 (1.83)  | <b>0.04</b>      |
| Cerebral white matter   | 34.3 (2.05)     | 34.1 (2.19)    | 34.6 (1.90)  | <b>0.03</b>      |
| Cerebellum cortex       | 10.1 (1.22)     | 10.1 (1.27)    | 10.1 (1.19)  | 0.91             |
| Cerebellum white matter | 1.98 (0.28)     | 2.03 (0.30)    | 1.93 (0.26)  | <b>0.001</b>     |
| Corpus callosum         | 0.27 (0.05)     | 0.28 (0.04)    | 0.26 (0.05)  | <b>&lt;0.001</b> |
| Brainstem               | 1.68 (0.18)     | 1.69 (0.20)    | 1.66 (0.17)  | 0.15             |
| Lateral ventricle       | 1.92 (1.24)     | 1.88 (1.17)    | 1.95 (1.30)  | 0.62             |
| Ventral diencephalon    | 0.65 (0.06)     | 0.66 (0.06)    | 0.65 (0.05)  | 0.06             |
| Thalamus                | 1.28 (0.10)     | 1.29 (0.10)    | 1.27 (0.10)  | 0.10             |
| Putamen                 | 0.94 (0.14)     | 0.93 (0.16)    | 0.95 (0.12)  | 0.32             |
| Hippocampus             | 0.70 (0.07)     | 0.71 (0.07)    | 0.70 (0.07)  | 0.61             |
| Caudate                 | 0.64 (0.08)     | 0.65 (0.07)    | 0.63 (0.08)  | <b>0.02</b>      |
| Pallidum                | 0.28 (0.05)     | 0.28 (0.05)    | 0.27 (0.04)  | 0.25             |
| Amygdala                | 0.27 (0.04)     | 0.27 (0.04)    | 0.28 (0.04)  | <b>0.01</b>      |
| Accumbens               | 0.12 (0.03)     | 0.12 (0.03)    | 0.12 (0.02)  | 0.92             |

## Supplemental Figures

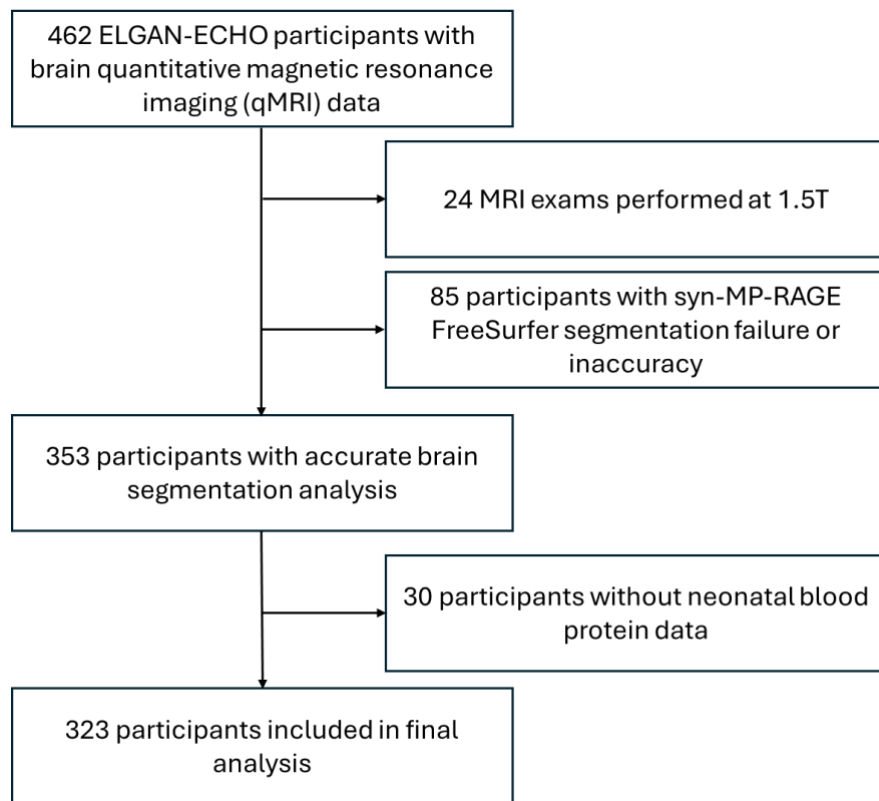

**Supplemental Figure 1.** Flowchart of participant selection from each of the 6 participating study sites. ELGAN-ECHO: Extremely Low Gestational Age Newborns–Environmental Influences on Child Health Outcomes, TSE: turbo spin echo.

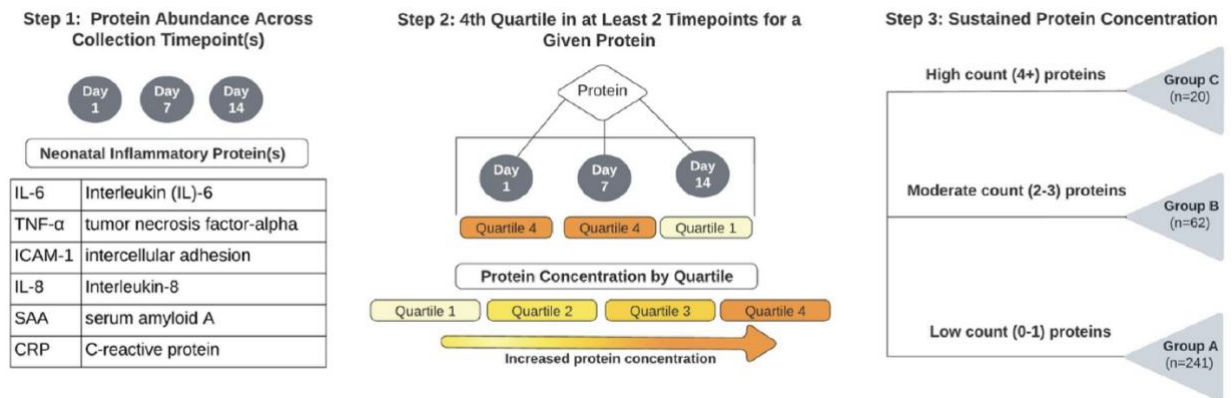

1

2

3

**Supplemental Figure 2.** Diagram of neonatal inflammation categorization. Neonates were classified into inflammation categories as low, moderate, or high.

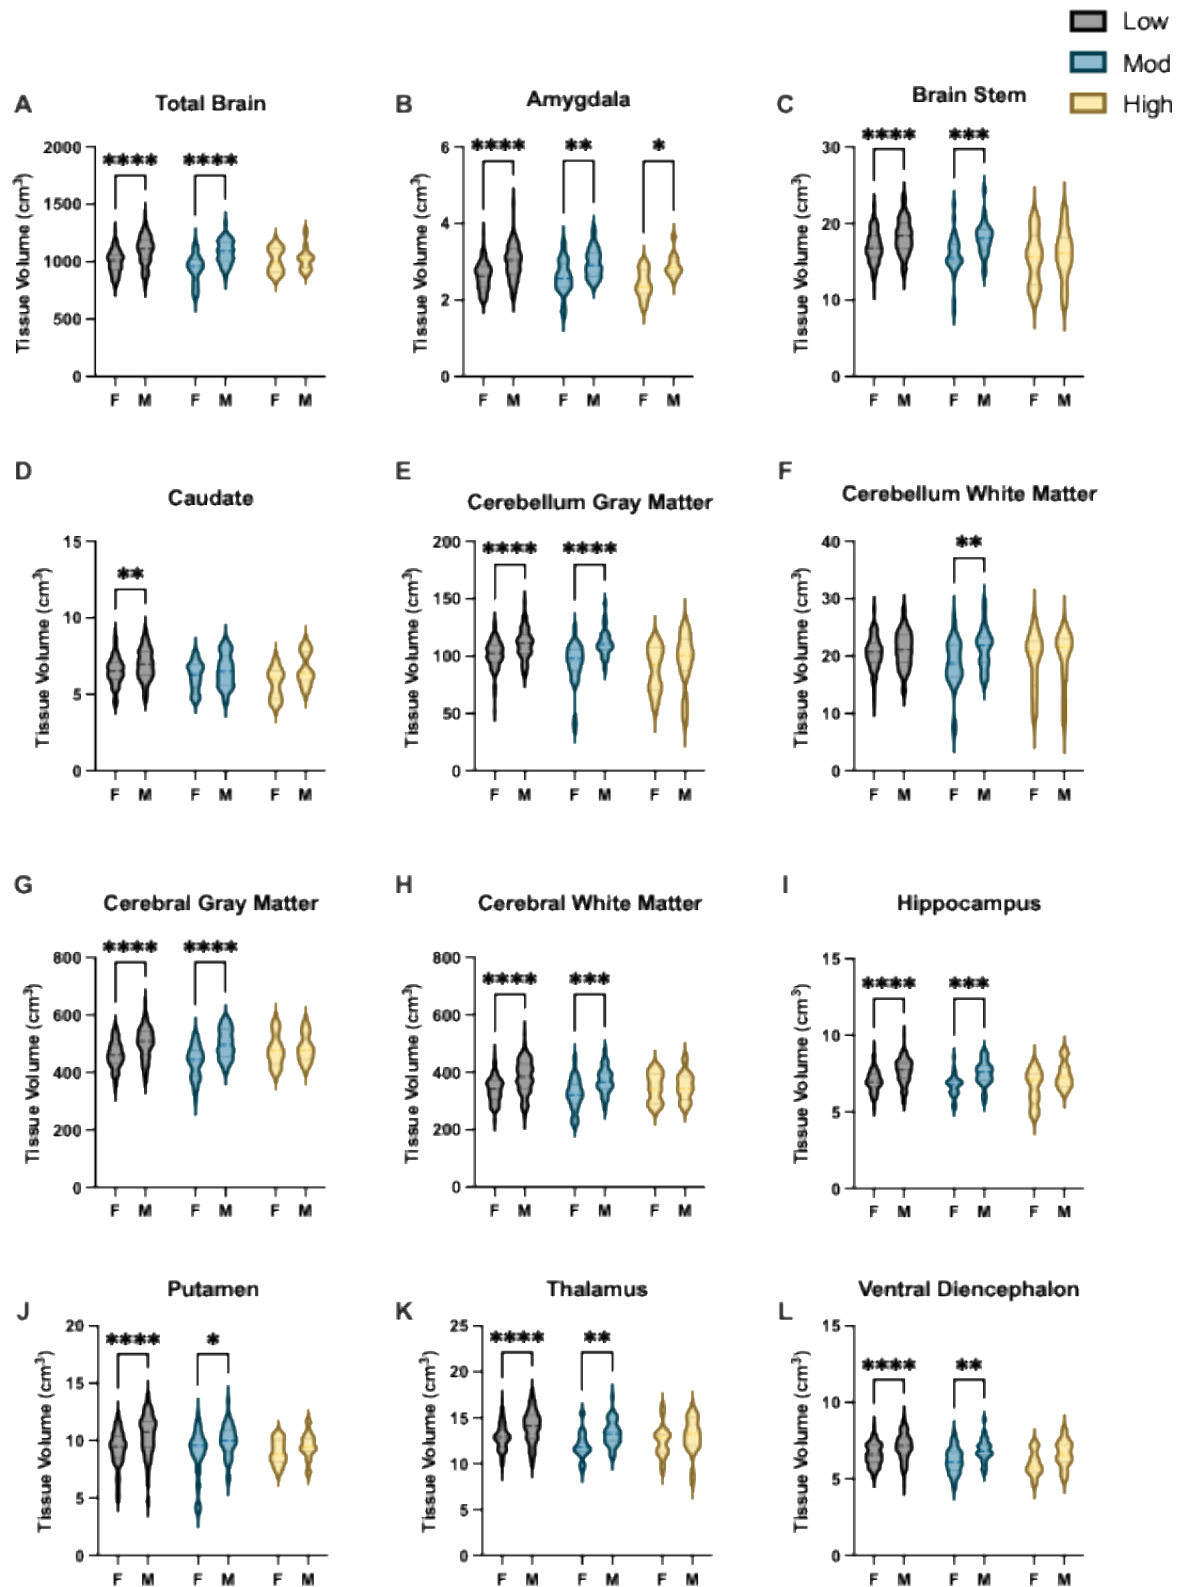

**Supplemental Figure 3.** Sex-specific associations between neonatal inflammation and brain volume. Mean brain volume (cm<sup>3</sup>) of the total brain and specific brain regions in 15-year-old ELGANS, categorized by level of inflammation (low, moderate (mod) and high) and stratified by sex (F=female; M=male). Statistical significance denoted by \* p≤0.05, \*\* p≤0.005, \*\*\* p≤0.0005, \*\*\*\* p≤0.00005
